# Supplementary material for: Template-free synthesis of mesoporous CeO2powders by integrating bottom-up and top-down routes for acid orange 7 adsorption
Source: Royal Society of Chemistry journal article supplement (doi:10.1039/c5ra03274a), 2015-01-01
Supplement: c5ra03274a1.pdf [file c5ra03274a1.pdf]

## Supporting Information

### **Template-free synthesis of mesoporous CeO<sub>2</sub> powders based on the chemical etching and reconstruction of precursors for acid orange 7 adsorption**

Yaohui Xu<sup>a</sup> and Ruixing Li<sup>a\*</sup>

*<sup>a</sup> Key Laboratory of Aerospace Materials and Performance (Ministry of Education), School of Materials Science and Engineering, Beihang University, Beijing 100191, China*

Corresponding author:

Ruixing Li, Ph.D.,

Professor

School of Materials Science and Engineering, Beihang University,

(formerly *Beijing University of Aeronautics and Astronautics*)

Xueyuanlu No.37, School of materials science and engineering, Beijing 100191, China

TEL / FAX: 86-10-8231-6500

E-mail: ruixingli@yahoo.com

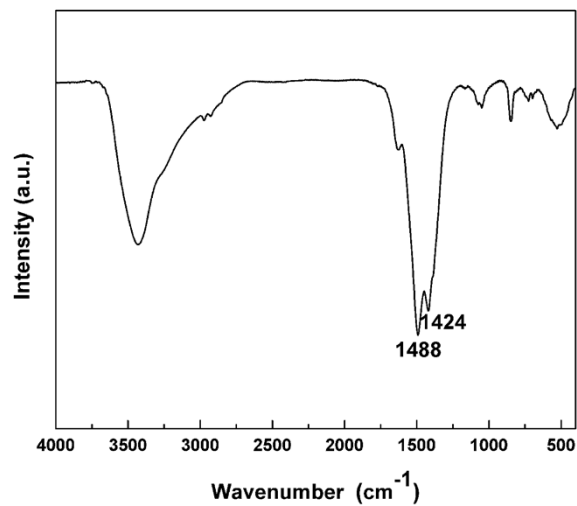

**Figure S1.** FT-IR spectrum of the precursor obtained after adding  $\text{NH}_4\text{HCO}_3$  to the  $\text{Ce}^{3+}$  solution (Precursor in Fig. 1).

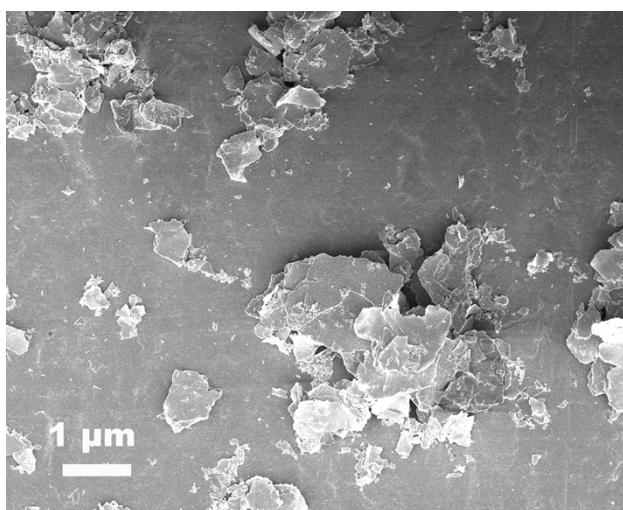

**Figure S2.** SEM image of the product obtained in the absence of  $\text{H}_2\text{O}_2$  (Sample 1 in Fig. 1).

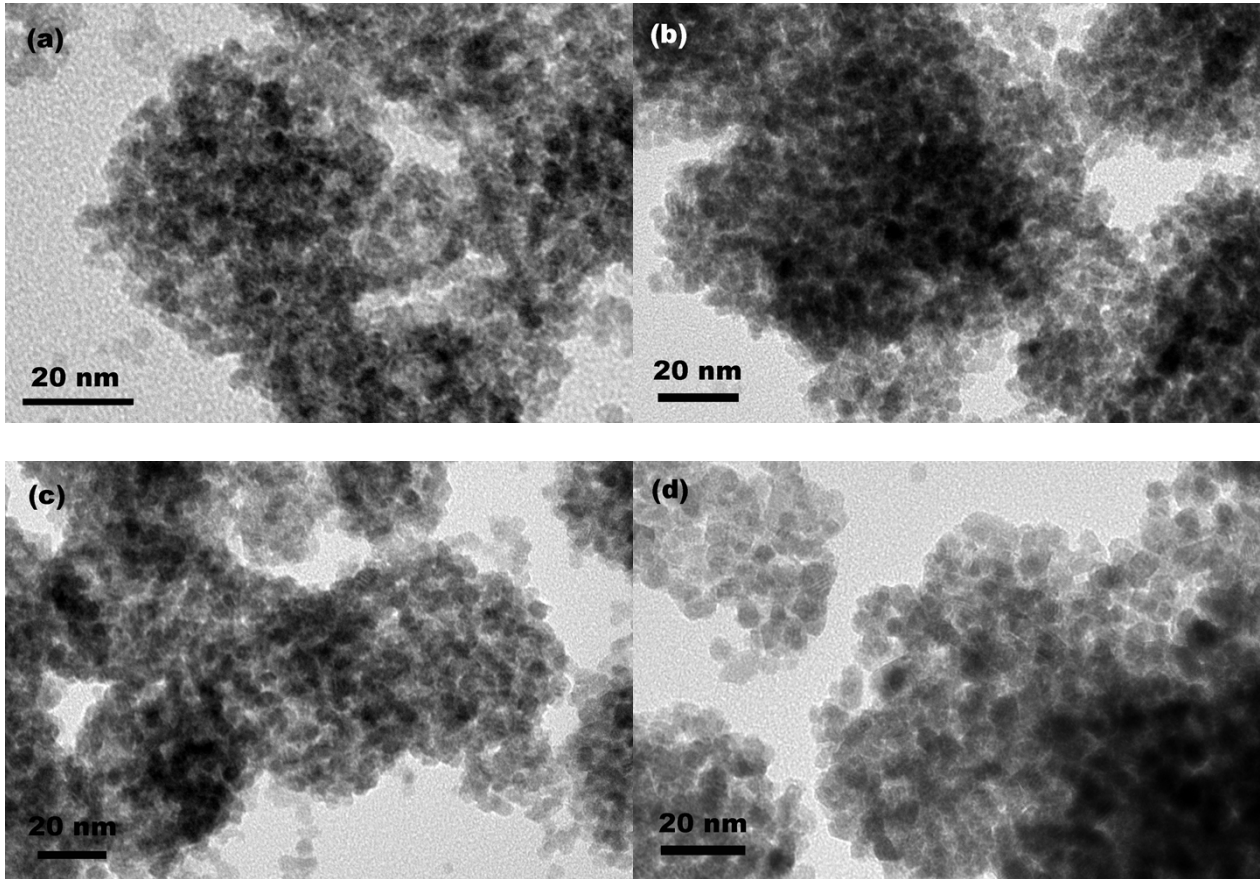

**Figure S3.** TEM images of the samples synthesized by hydrothermal method at 200 °C for (a) 1 h, (b) 6 h, (c) 12 h and (d) 36 h.
